# Supplementary material for: WNT/β-catenin signaling inhibits CBP-mediated RelA acetylation and expression of proinflammatory NF-κB target genes
Source: Oxford University Press journal article supplement (doi:10.1242/jcs.168542), 2015-01-01
Supplement: jcs168542supp.pdf [file jcs168542supp.pdf]

## Supplementary Figures

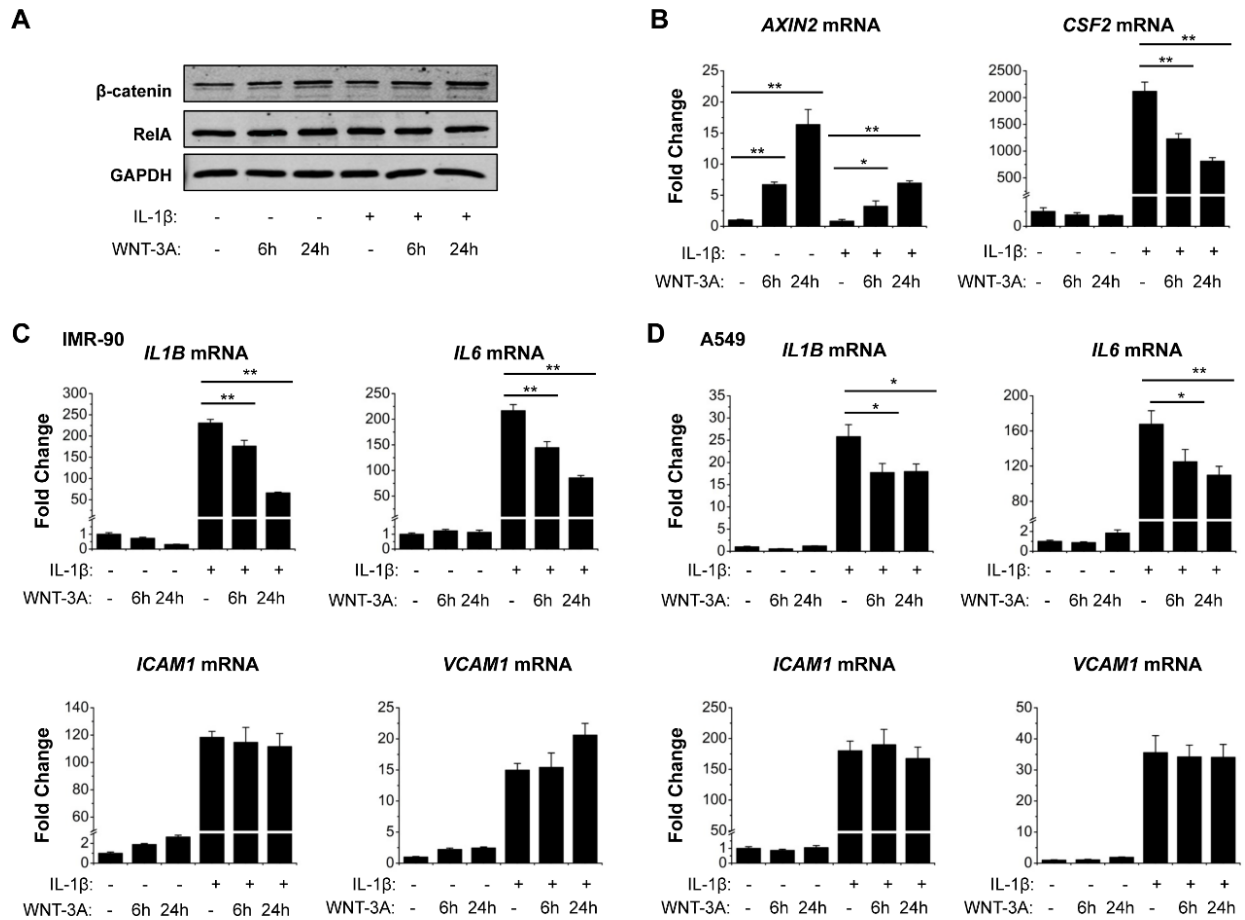

**Fig. S1.** (A) MRC-5 cells were treated with WNT-3A for the indicated times and IL-1 $\beta$  was added 4 h before harvest of samples. Protein expression was analyzed by Western blot (representative blot of 2 independent experiments shown). (B–D) MRC-5 (B), IMR-90 (C) and A549 (D) cells were treated with WNT-3A for the indicated times and IL-1 $\beta$  was added 4 h before harvest of samples. mRNA expression was measured by qRT-PCR. \*  $P < 0.05$ ; \*\*  $P < 0.01$ ;  $n = 3$ .

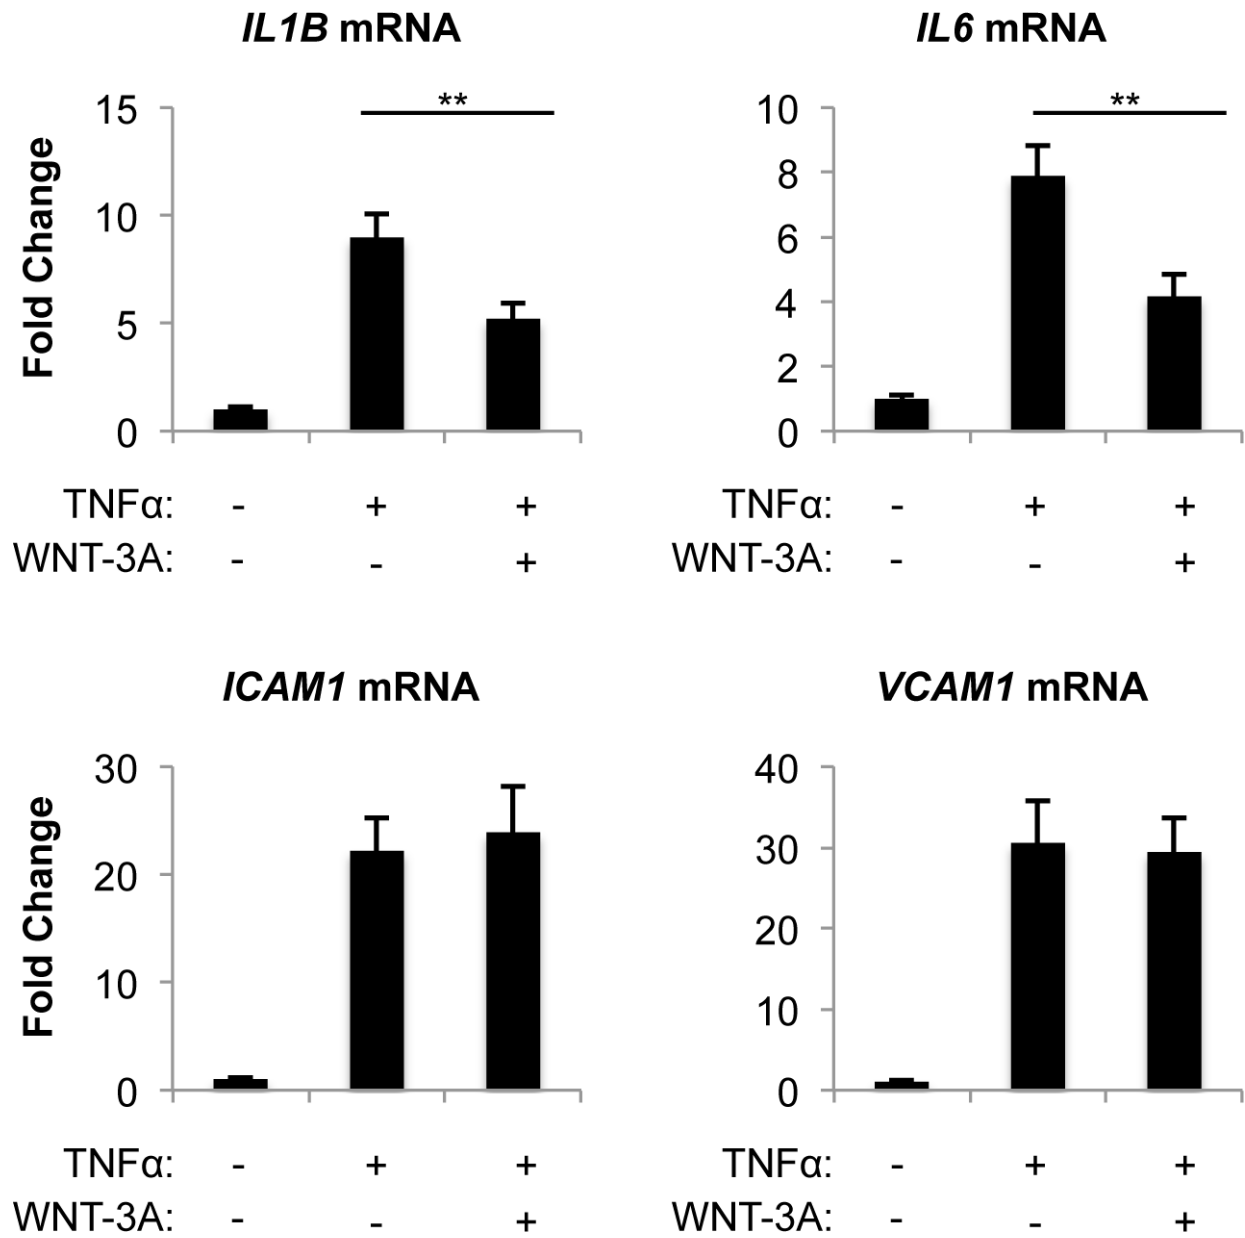

**Fig. S2.** MRC-5 cells were treated with WNT-3A for 24 h and TNFα was added for 4 h before harvest of samples. mRNA expression was measured by qRT-PCR. \*\*  $P < 0.01$ ;  $n = 3$ .

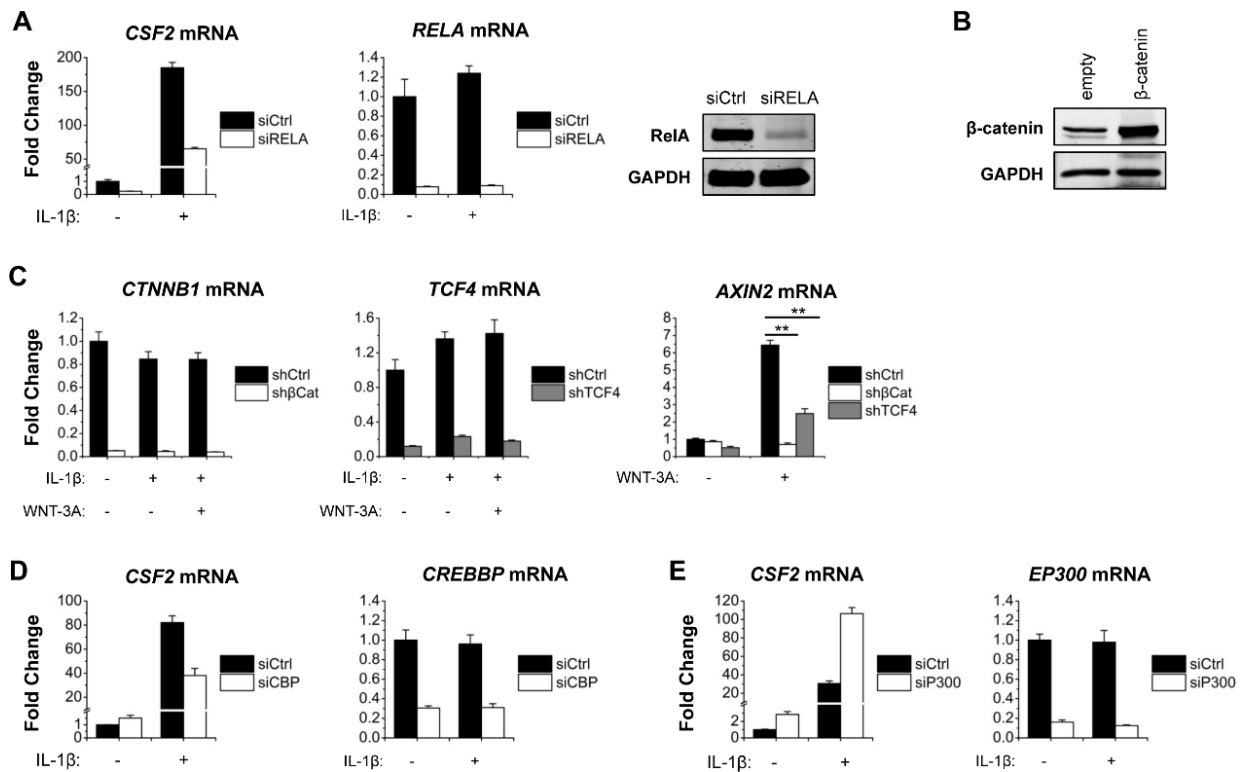

**Fig. S3.** (A) MRC-5 cells were transfected with control siRNA (siCtrl) or siRNA against RelA (siRELA) and then stimulated with IL-1β for 4 h. mRNA expression was measured by qRT-PCR. Protein expression was analyzed by Western blot. (B) Western blot analysis of protein expression in MRC-5 cells transduced with lentiviruses expressing empty control and β-catenin. (C) MRC-5 cells were transduced with lentiviruses expressing either control shRNA (shCtrl), shRNA against β-catenin/*CTNNB1* (shβCat) or TCF4 (shTCF4) for 3 d and then stimulated with IL-1β for 4 h. mRNA expression was measured by qRT-PCR. \*\*  $P < 0.01$ ;  $n = 3$ . (D) MRC-5 cells were depleted of CBP (CREBBP) by siRNA tranfection and stimulated with IL-1β for 4 h. mRNA expression was measured by qRT-PCR. (E) MRC-5 cells were depleted of p300 (EP300) by siRNA tranfection and stimulated with IL-1β for 4 h. mRNA expression was measured by qRT-PCR. For Western blot data, representative blots of 2 independent experiments are shown.

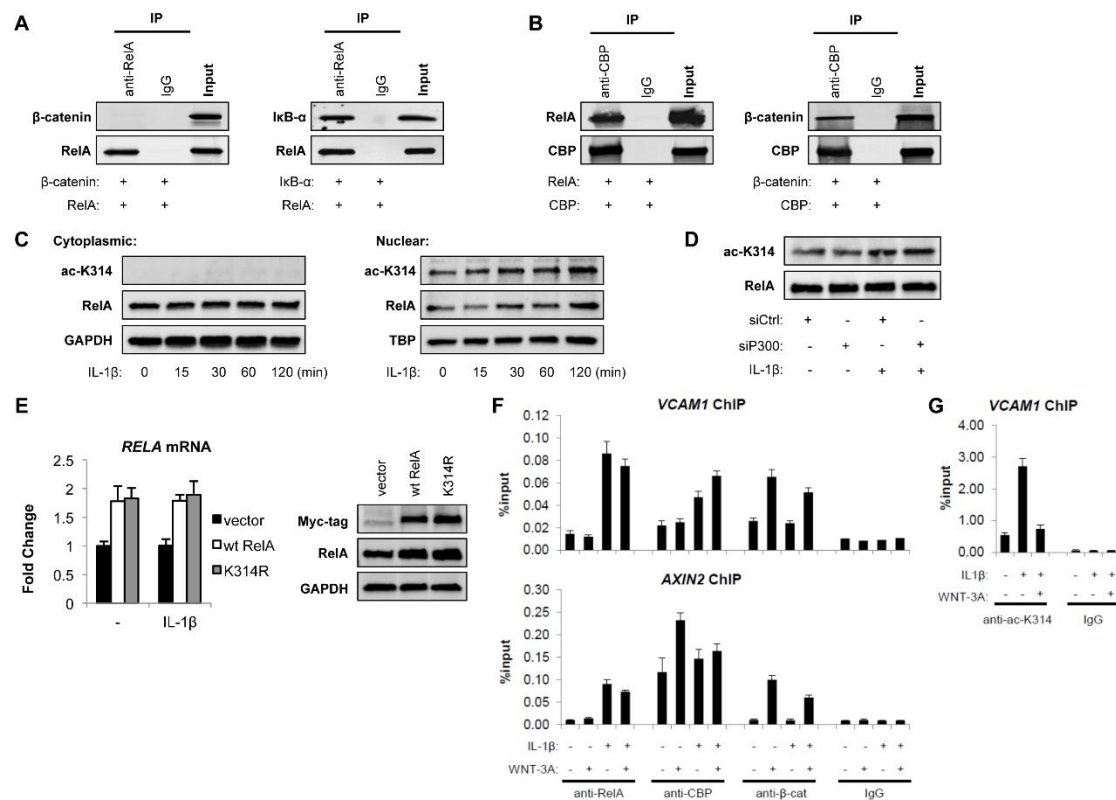

**Fig. S4.** (A) Recombinant RelA was incubated with either  $\beta$ -catenin or I $\kappa$ B- $\alpha$ . Protein mixtures were then immunoprecipitated with anti-RelA antibody and subjected to Western blot analysis. (B) Recombinant CBP was incubated with either  $\beta$ -catenin or RelA. Protein mixtures were then immunoprecipitated with anti-CBP antibody and subjected to Western blot analysis. (C) MRC-5 cells were treated with IL-1 $\beta$  for indicated times. Western blot analysis of protein expression was performed in cytoplasmic and nuclear fractions. (D) MRC-5 cells were transfected with control siRNA (siCtrl) or siRNA against p300 (siP300) and then stimulated with IL-1 $\beta$  for 30 min. Total protein lysates were then subjected to Western blot analysis. (E) MRC-5 cells were transfected with empty vector, wild-type (wt) RelA and K314R mutant plasmids and then stimulated with IL-1 $\beta$  for 4 h. mRNA expression was measured by qRT-PCR and protein expression was analyzed by Western blot. For Western blot data, representative blots of 2 independent experiments are shown. (F) MRC-5 cells were stimulated with WNT-3A for 18 h and IL-1 $\beta$  was added 1 h before harvest of samples. Binding of RelA, CBP or  $\beta$ -catenin to *VCAM1* and *AXIN2* promoter was analyzed by ChIP. (G) MRC-5 cells were stimulated with WNT-3A for 18 h and IL-1 $\beta$  was added 1 h before harvest of samples. Binding of acetylated RelA at K314 to *VCAM1* promoter was analyzed by ChIP.
